# Supplementary material
Source: Springer Nature journal article supplement (https://www.springermedizin.de/resource/supplementary/12913_2013_3059_MOESM12_ESM.pdf/9532262)

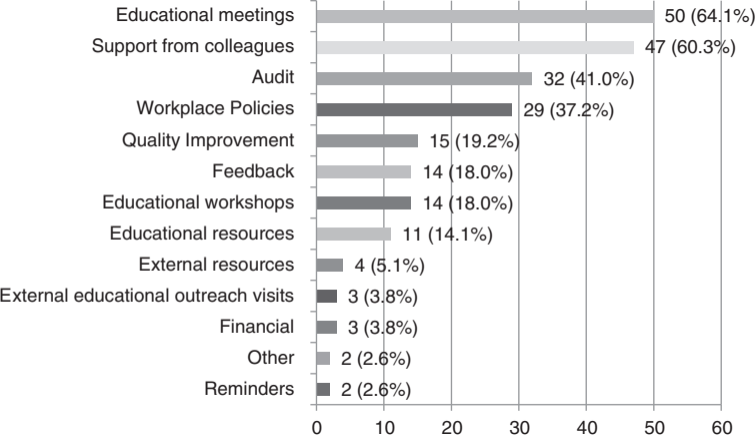

Supplement: MOESM12 [file 9532262]
